# Supplementary material
Source: Springer Nature journal article supplement (https://www.springermedizin.de/resource/supplementary/13584_2012_57_MOESM2_ESM.pdf/9676970)
Supplement: MOESM2 [file 9676970]

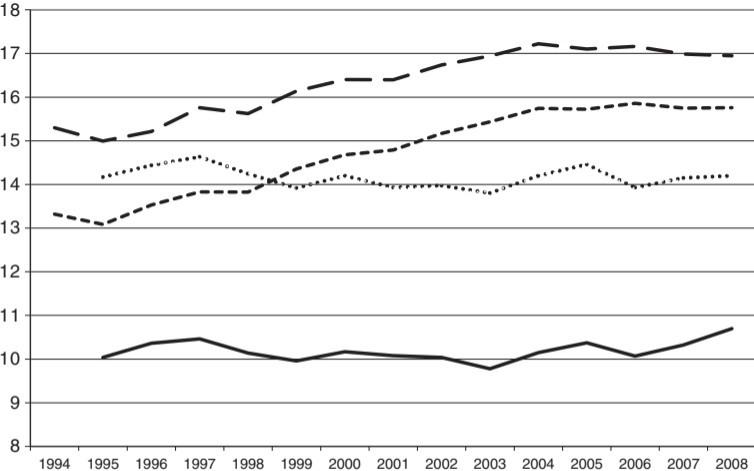

— IS - Total gov. expenditure  
..... IS - Primary civilian gov. expenditure  
- - - OECD - Total gov. expenditure  
- . - OECD - Primary civilian gov. expenditure
